# Supplementary material for: T-Cell Levels Are Prognostic in Mantle Cell Lymphoma
Source: Oxford University Press journal article supplement (doi:10.1158/1078-0432.ccr-14-0889), 2014-10-08
Supplement: 10780432ccr140889-sup-129931_1_supp_2555595_n8gm6b.doc [file 10780432ccr140889-sup-129931_1_supp_2555595_n8gm6b.doc]

Supplementary Table 1. Antibody clones used in flow cytometry.

**Antibody Clone Company**

CD3 UCHT1 Beckman Coulter

CD4 SK3/OKT4/RPA-T4 Biolegend

CD5 L17F12, 4C4 BD Bioscience, Dako

CD8 CD8/144B Dako

CD10 W8E7 BD Bioscience

CD14 MmyP9,TUK4 BD Bioscience, Dako

CD19 J3-119 Beckman Coulter

CD20 2H7 Biolegend

CD23 DAK-CD23 Dako

CD56 MY31 BD Bioscience

CD200 MRC OX-104 BD Bioscience

kappa R10-21-F3 Dako

lambda N10/2 Dako
