# Supplementary material for: T-Cell Levels Are Prognostic in Mantle Cell Lymphoma
Source: Oxford University Press journal article supplement (doi:10.1158/1078-0432.ccr-14-0889), 2014-10-08
Supplement: 10780432ccr140889-sup-129931_1_supp_2555596_n8gm6b.doc [file 10780432ccr140889-sup-129931_1_supp_2555596_n8gm6b.doc]

Supplementary Table 2. T cell levels (% of cells in mononuclear gate) and CD4/CD8 ratio in reactive lymph nodes and MCL with different growth patterns (median, range).

**CD3 CD4 CD8 CD4/CD8**

Reactive (n=26) 52.9 (17.6-75.6) 39.6 (14.1-63.4) 10.0 (2.4-19.2) 4.2 (2.1-6.9)

Mantle zone (n=25) 30.4 (10.9-84.0) 17.4 (7.4-63.2) 7.9 (1.2-21.1) 3.1 (0.9-7.7)

Nodular (n=29) 16.7 (2.3-71.4) 9.6 (1.1-58.9) 5.2 (1.1-15.2) 2.0 (0.6-8.6)

Diffuse (n=53) 10.4 (2.0-43.7) 5.6 (0.7-37.0) 4.1 (0.4-20.1) 1.7 (0.4-10.4)

Significant differences were:

**CD3:** reactive to mantle zone, reactive to nodular, reactive to diffuse and mantle zone to diffuse all p<0.001, mantle zone to nodular p=0.007, nodular to diffuse p=0.022

**CD4:** reactive to mantle zone, reactive to nodular, reactive to diffuse and mantle zone to diffuse all p<0.001, mantle zone to nodular p=0.003, nodular to diffuse p=0.015

**CD8:** reactive to nodular p=0.007, reactive to diffuse and mantle zone to diffuse all p<0.001

**CD4/CD8:** reactive to mantle zone p=0.015, reactive to nodular and reactive to diffuse all p<0.001, mantle zone to diffuse p=0.002
